# Supplementary material for: Exploring the optimal post-treatment strategy for boosting the electrochemical performances of a new bimetal–organic framework-based supercapacitor
Source: Royal Society of Chemistry journal article supplement (doi:10.1039/d4qi02314e), 2024-01-01
Supplement: d4qi02314e1.pdf [file d4qi02314e1.pdf]

## *Supplementary Information*

# Exploring the optimal posttreatment strategy for boosting the electrochemical performances of a new bimetal–organic framework-based supercapacitor

Xinwen Dou, Mingyue Liu, Tian Cao, Chan Wang, Yingjie Zhang, Yuhang Jia, Qiang Ju and Zhenlan Fang\*

### Table of Contents

|                                                                                                                 |    |
|-----------------------------------------------------------------------------------------------------------------|----|
| 1.0 Experimental part: synthesis and characterizations.....                                                     | 2  |
| 1.1 Materials.....                                                                                              | 2  |
| 1.2 Methods.....                                                                                                | 2  |
| 1.3 Characterization methods.....                                                                               | 4  |
| 1.4 Thermogravimetric analysis.....                                                                             | 7  |
| 1.4.1 TGA curves of $Ni_xCo_y$ -MOF.....                                                                        | 7  |
| 1.5 SEM analysis.....                                                                                           | 8  |
| 1.5.1 SEM images of $Ni_xCo_y$ -S-140-6 ( $x = 1, y = 0; x = 1, y = 1; x = 1, y = 2; x = 0, y = 1$ ).....       | 8  |
| 1.5.2 SEM images of $Ni_xCo_y$ -MOF, $Ni_2Co_1$ -C, $Ni_2Co_1$ -O, $Ni_2Co_1$ -OH, and $Ni_2Co_1$ -S-140-6..... | 9  |
| 1.5.3 SEM images of $Ni_2Co_1$ -S-140- $t$ ( $T=1, 6, 12h$ ).....                                               | 10 |
| 1.5.4 SEM images of $Ni_2Co_1$ -S-T-6 ( $T = 100, 140, 180\text{ }^\circ\text{C}$ ).....                        | 11 |
| 1.6 TEM analysis.....                                                                                           | 12 |
| 2.0 Electrochemical performance.....                                                                            | 12 |
| 2.1 GITT data of $Ni_2Co_1$ -MOF, $Ni_2Co_1$ -S, $Ni_2Co_1$ -C, $Ni_2Co_1$ -O, and $Ni_2Co_1$ -OH.....          | 12 |
| 2.2 Electrochemical performance of $Ni_2Co_1$ -S- $T$ - $t$ .....                                               | 13 |
| 2.3 Electrochemical performance of PPy@AECC.....                                                                | 14 |
| 2.4 The Nyquist plots of $Ni_2Co_1$ -S-140-6//PPy@AECC device.....                                              | 15 |
| 2.5 The $R_{ct}$ and $R_s$ of $Ni_xCo_y$ -MOF and $Ni_2Co_1$ -MOF derivatives.....                              | 15 |
| 2.6 The electrochemical performance of $Ni_2Co_1$ -C-900.....                                                   | 16 |
| 3.0 Supplementary References.....                                                                               | 16 |

## 1.0 Experimental part: synthesis and characterizations

### 1.1 Materials

Carbon cloth (CC) was purchased from Shanghai Hesun Co., Ltd.; Ethanol (99.7%) and *N, N*-dimethylformamide (DMF,  $\geq 99.5\%$ ) were purchased from Wuxi Yasheng Chemical Co., Ltd.;  $\text{Ni}(\text{NO}_3)_2 \cdot 6\text{H}_2\text{O}$  (98%), 1,4-dicarboxybenzene (BDC, 96%),  $\text{Na}_2\text{S} \cdot 9\text{H}_2\text{O}$  (96%), carbon black ( $\geq 99.9\%$ ), polyvinylidene fluoride (PVDF,  $\geq 99.9\%$ ) and *N*-methylpyrrolidone (NMP, 99.9%) were purchased from Energy-Chemical, Anhui Zesheng Technology Co., Ltd.;  $\text{Co}(\text{NO}_3)_2 \cdot 6\text{H}_2\text{O}$  (98.5%) was purchased from Sinopharm Chemical Reagent Co., Ltd.; polypyrrole (98%) and KOH (95.0%) were purchased from Shanghai Macklin Biochemical Co., Ltd.; NaCl ( $\geq 99.5\%$ ) was purchased from Guangzhou Xilong Chemical Reagent Co., Ltd.; Ethylene glycol (EG,  $\geq 99.0\%$ ),  $\text{H}_2\text{SO}_4$  (95-98 wt%) and  $\text{KMnO}_4$  (99.5%) were purchased from Shanghai Lingfeng Chemical Reagent Co., Ltd., and all these chemical reagents were used without further purification.

### 1.2 Methods

**Synthesis of  $\text{Ni}_x\text{Co}_y\text{-MOF}$ :** In a typical synthesis of  $\text{Ni}_x\text{Co}_y\text{-MOF}$ , a mixture of 0.9 mmol 1,4-dicarboxybenzene (BDC) and 2.5 mmol  $\text{M}(\text{NO}_3)_2 \cdot 6\text{H}_2\text{O}$  ( $\text{M} = \text{Ni}, \text{Co}$  and the mixture of Ni and Co with feeding ratio of 2:1, 1:1 and 1:2, respectively) was dissolved in a mixed solution of DMF (8 mL) and EG (5 mL). After stirred for 0.5 h, the mixture was transferred to a Teflon-lined autoclave (20 mL), heated at 180 °C for 8 h before cooling down to room temperature with a rate of 30 °C h<sup>-1</sup>. After centrifugation at 8000 rpm/min for 4 minutes and sequentially washing with DMF and anhydrous ethanol several times to remove unreacted chemical reagents, the precipitate was finally dried at 60 °C for 12 h. The detailed experimental conditions are listed in Table S1.

**Synthesis of  $\text{Ni}_x\text{Co}_y\text{-S}$ :** Ni/Co-S was prepared by dissolving of  $\text{Ni}_x\text{Co}_y\text{-MOF}$  (80 mg) in ethanol (7 mL) with ultrasonication for 1 h, followed by stirring for 30 min. In another breaker, 40 mg of  $\text{Na}_2\text{S} \cdot 9\text{H}_2\text{O}$  was added to deionized water (7 mL) and stirred for 20 min. Next, the two solutions were mixed, and the mixture was stirred for 3 min. The mixture was then placed in a 25 mL Teflon-lined stainless autoclave, and kept at 140 °C for 6 h, and then cooled to room temperature. After

centrifugation, the obtained Ni<sub>x</sub>Co<sub>y</sub>-S powder products were washed with ethanol and deionized water alternately, and then dried at 70 °C overnight.

**Synthesis of Ni<sub>2</sub>Co<sub>1</sub>-C:** Ni<sub>2</sub>Co<sub>1</sub>-C was prepared by heating Ni<sub>2</sub>Co<sub>1</sub>-MOF (100 mg) to 600°C at a rate of 5°C/min under an Ar flow, and then kept at 600°C for 6 h.

**Synthesis of Ni<sub>2</sub>Co<sub>1</sub>-O:** Ni<sub>2</sub>Co<sub>1</sub>-O was prepared by heating Ni<sub>2</sub>Co<sub>1</sub>-MOF (100 mg) to 250°C at a rate of 5°C/min under air, and then kept at 600°C for 6 h.

**Synthesis of Ni<sub>2</sub>Co<sub>1</sub>-OH:** Ni<sub>2</sub>Co<sub>1</sub>-OH was prepared by immersing of Ni<sub>2</sub>Co<sub>1</sub>-MOF (100 mg) in 1 M KOH under stirring for 6 h at room temperature. After that, the solid was separated by deionized water and ethanol to remove the redundant KOH.

**Table. S1** The detailed synthesis parameters of a series of Ni<sub>x</sub>Co<sub>y</sub>-MOF samples

| Sample                               | Ni(NO <sub>3</sub> ) <sub>2</sub><br>·6H <sub>2</sub> O (g/mmol) | Co(NO <sub>3</sub> ) <sub>2</sub><br>·6H <sub>2</sub> O (g/mmol) | BDC<br>(g/mmol) | EG<br>(mL) | DMF<br>(mL) | Temperatur<br>e (°C) | Time<br>(h) |
|--------------------------------------|------------------------------------------------------------------|------------------------------------------------------------------|-----------------|------------|-------------|----------------------|-------------|
| Ni-MOF                               | 0.75/2.5mmol                                                     | 0/0                                                              | 0.15/0.9mmol    | 25         | 40          | 180                  | 8           |
| Co-MOF                               | 0/0                                                              | 0.75/2.5 mmol                                                    | 0.15/0.9mmol    | 25         | 40          | 180                  | 8           |
| Ni <sub>1</sub> Co <sub>2</sub> -MOF | 0.25/0.83mmol                                                    | 0.5/1.66 mmol                                                    | 0.15/0.9mmol    | 25         | 40          | 180                  | 8           |
| Ni <sub>1</sub> Co <sub>1</sub> -MOF | 0.37/1.25mmol                                                    | 0.37/1.25mmol                                                    | 0.15/0.9mmol    | 25         | 40          | 180                  | 8           |
| Ni <sub>2</sub> Co <sub>1</sub> -MOF | 0.5/1.66mmol                                                     | 0.25/0.83mmol                                                    | 0.15/0.9mmol    | 25         | 40          | 180                  | 8           |

**Synthesis of acid-etched carbon cloth (AECC):** The 1 × 1 cm<sup>2</sup> CC pieces were immersed in a mixed solvent of 10 ml HNO<sub>3</sub> (65-68 wt%) and 20 ml H<sub>2</sub>SO<sub>4</sub> (95-98 wt%), which was sealed in Teflon-lined autoclave (50 mL), and then heated at 60 °C for 2 h. After cooling to room temperature, 1.5 g KMnO<sub>4</sub> was slowly added to the above solvent, and the CC pieces were kept in it for another 18 h, followed by adding 100 mL deionized water and 3 mL H<sub>2</sub>O<sub>2</sub> to the resulting solution. The treated CC was washed repeatedly with deionized water under ultrasonication for 2 h, and finally dried at 60 °C to yield the final product AECC.

**Electrodeposition of PPy on AECC (PPy@AECC):** An electrochemical workstation (CHI660E) was used to electrodeposit PPy film on the AECC electrode with the 1 × 1 cm<sup>2</sup> working area, and the

AECC, Ag/AgCl and Pt foil were used as working electrode, reference electrode and counter electrode, respectively. The electrolyte was prepared by dissolving 0.135 g pyrrole and 0.235 g NaCl into 30 mL deionized water. The PPy@AECC cathode with PPy ranging from 3 to 6 mg cm<sup>-2</sup> was obtained through electrodeposition of PPy on AECC at a constant potential of 1.0 V for 1000 s.

### 1.3 Characterization methods

**Material characterization:** Powder X-ray diffraction (PXRD) patterns of all samples were recorded on a Rigaku Smartlab (3 KW) equipment with a Ni filter using Cu-K $\alpha$  radiation ( $\lambda = 1.542 \text{ \AA}$ ). The patterns were collected in reflectance of Bragg-Brentano geometry over a range of  $2\theta = 5^\circ - 50^\circ$  at room temperature. Fourier transform infrared spectrum (FTIR) patterns of all samples were recorded using a Bruker ALPHA FTIR under nitrogen atmosphere in the range 4000 – 400 cm<sup>-1</sup>, placed in a N<sub>2</sub> glove-box. X-ray photoelectron spectroscopy (XPS) analysis was carried out on a Thermo Scientific ESCALAB 250 Xi spectrometer with a monochromatized Al K $\alpha$  X-ray source (1486.6 eV) at a constant dwell time of 50 ms and a pass-energy of 50 eV. The binding energies were calibrated to the C 1s line at 284.8 eV as a reference, and the XPS spectra were deconvoluted using the software Avantage. N<sub>2</sub> adsorption/desorption measurements: the BET surface areas and pore size distributions, were determined from the isothermal N<sub>2</sub> (99.9999%) adsorption/desorption curves of all samples with weight of ~100 mg, recorded by the Micromeritics 3 FLEX instrument at 78 K, and analyzed by both Barrett-Joyner-Halenda (BJH) and Density Functional Theory (DFT) methods. The Ni<sub>2</sub>Co<sub>1</sub>-MOF was immersed in ethanol at 80 °C for 24 h, then dried in an oven at 80 °C under air for 12 h, all obtained samples were activated at 180 °C under vacuum ( $\sim 10^{-3}$  mbar) for 24 h. The morphologies and chemical compositions of all samples were investigated by a JSM 7800F scanning electron microscope (SEM) equipped with an energy dispersive X-ray spectrum (EDS). Transmission electron microscope (TEM) was performed by a Talos JEM-1400PLUS transmission electron microscope at an acceleration voltage of 200 kV.

**Electrochemical Measurement:** The electrochemical performances of the prepared working electrodes were carried out in 1.0 M KOH electrolyte using a CHI660E electrochemical workstation (Chenhua Instrument Co., Ltd., Shanghai, China) with a three-electrode system: a platinum plate as

the counter electrode and Ag/AgCl as the reference electrode. For the working electrode, active materials (80%), carbon black (10%) and polyvinylidene fluoride (PVDF, 10%) were mixed into the *N*-methylpyrrolidone (NMP), afterword a piece of nickel foam (1 cm × 1 cm) was immersed in the resulting homogeneous slurry, followed by being heated at 80 °C for 12 h and subsequently pressed under 10.0 MPa. The electrochemical tests for the as-prepared working electrode were examined by cyclic voltammetry (CV) and galvanostatic charge/discharge (GCD). Electrochemical impedance spectroscopy (EIS) was conducted in a frequency range from 0.01 to 10<sup>5</sup> Hz, while the cycle performance was measured using a NEWARE CT-4008T-5V-50mA-164 (Neware Co., Ltd., China) battery testing system.

Aqueous asymmetric supercapacitors (A-ASC) were assembled by Ni<sub>2</sub>Co<sub>1</sub>-S based positive electrodes and PPy@AECC negative electrodes in 1.0 M KOH aqueous solution electrolyte.

The specific capacitance was determined by following Eq. 1:

$$C = \frac{I\Delta t}{m\Delta V} \dots\dots\dots \text{Eq. 1}$$

in which *C* (F g<sup>-1</sup>), *m* (g), *I* (A), *Δt* (s) and *ΔV* (V) represent for specific capacitance, mass of active material in one electrode, charge/discharge current, discharge time and potential window, respectively.

The energy density (*E*, Wh kg<sup>-1</sup>) and power density (*P*, W kg<sup>-1</sup>) of the A-ASC were calculated by Eq. 2 and Eq. 3, respectively.

$$E = \frac{1}{2} \times \frac{C}{3600} (\Delta V)^2 \dots\dots\dots \text{Eq. 2}$$

$$P = \frac{3600 \times E}{\Delta t} \dots\dots\dots \text{Eq. 3}$$

Herein, *C* is specific capacitance of the A-ASC, calculated by the weight sum of active materials in both positive and negative electrode; *ΔV* (V) and *Δt* (s) represent the voltage window and discharge time of the A-ASC, respectively.

**Supplementary Tab. S2** Ratio of Ni<sup>3+</sup> to Ni<sup>2+</sup>, Co<sup>3+</sup> to Co<sup>2+</sup>, Ni to Co, M<sup>3+</sup> to M<sup>2+</sup>

|                                          | <sup>a</sup> Ratio of Ni to Co | <sup>b</sup> Ratio of Ni <sup>3+</sup> to Ni <sup>2+</sup> | <sup>b</sup> Ratio of Co <sup>3+</sup> to Co <sup>2+</sup> | <sup>b</sup> Ratio of M <sup>3+</sup> to M <sup>2+</sup> |
|------------------------------------------|--------------------------------|------------------------------------------------------------|------------------------------------------------------------|----------------------------------------------------------|
| Ni <sub>1</sub> Co <sub>1</sub> -MOF     | 0.96                           |                                                            |                                                            |                                                          |
| Ni <sub>1</sub> Co <sub>2</sub> -MOF     | 0.49                           |                                                            |                                                            |                                                          |
| Ni <sub>2</sub> Co <sub>1</sub> -MOF     | 1.82                           | 0.46                                                       | 2.26                                                       | 0.90                                                     |
| Ni <sub>2</sub> Co <sub>1</sub> -S-140-6 |                                | 0.62                                                       | 2.46                                                       | 1.54                                                     |
| Ni <sub>2</sub> Co <sub>1</sub> -C       |                                | 1.50                                                       | 1.85                                                       | 1.68                                                     |
| Ni <sub>2</sub> Co <sub>1</sub> -O       |                                | 1.75                                                       | 1.61                                                       | 1.71                                                     |
| Ni <sub>2</sub> Co <sub>1</sub> -OH      |                                | 0.47                                                       | 2.56                                                       | 0.82                                                     |

<sup>a</sup> Ratio of Ni to Co is determined by ICP-OES elemental analysis.

<sup>b</sup> Ratio of Ni to Co is determined by XPS analysis

**Supplementary Tab. S3.** BET surface areas and total pore volumes of all the dried samples. All the calculations are based on their N<sub>2</sub> sorption isotherms at 78 K.

|                                          | BET [m <sup>2</sup> /g] | Total pore volume (p/p <sub>0</sub> = 0.95) [cm <sup>3</sup> /g] |
|------------------------------------------|-------------------------|------------------------------------------------------------------|
| Ni <sub>2</sub> Co <sub>1</sub> -MOF     | 747.88                  | 0.606                                                            |
| Ni <sub>2</sub> Co <sub>1</sub> -S-140-6 | 63.77                   | 0.140                                                            |
| Ni <sub>2</sub> Co <sub>1</sub> -C       | 59.73                   | 0.104                                                            |
| Ni <sub>2</sub> Co <sub>1</sub> -O       | 24.22                   | 0.041                                                            |
| Ni <sub>2</sub> Co <sub>1</sub> -OH      | 154.24                  | 0.253                                                            |

## 1.4 Thermogravimetric analysis

### 1.4.1 TGA curves of $\text{Ni}_x\text{Co}_y\text{-MOF}$

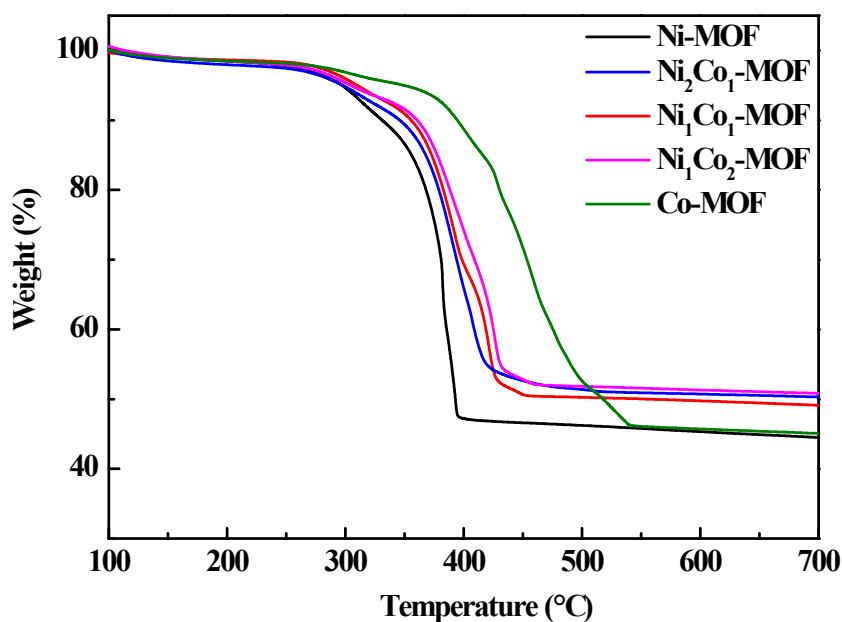

**Fig. S1** TGA curves of dry  $\text{Ni}_x\text{Co}_y\text{-MOFs}$  ( $x = 1, y = 0$ ;  $x = 2, y = 1$ ;  $x = 1, y = 1$ ;  $x = 1, y = 2$ ;  $x = 0, y = 1$ ) samples after removal of guest molecules by heat treatment at 180 °C for 12 hours under nitrogen.

The TGA curves of the dry  $\text{Ni}_x\text{Co}_y\text{-MOFs}$  samples under nitrogen, obtained after removing all solvent molecules, show that the thermostability stability of them are elevated along with increasing the content of Co ion, being consistent with that of as-synthesized ones (Fig. S1). The mass loss in the temperature range from 250 °C to 550 °C of monometallic  $\text{Ni}_x\text{Co}_y\text{-MOFs}$  (54.1%), assigned to the decomposition of main skeleton due to the dissociation of BDC ligand, is obviously higher than that of bimetallic  $\text{Ni}_x\text{Co}_y\text{-MOFs}$  (48.43%–49.95%), probably attributed to the missing ligand defects due to the competition of Ni and Co ions coordinating to BDC ligand.<sup>1-4</sup>

## 1.5 SEM analysis

### 1.5.1 SEM images of $\text{Ni}_x\text{Co}_y\text{-S-140-6}$ ( $x = 1, y = 0$ ; $x = 1, y = 1$ ; $x = 1, y = 2$ ; $x = 0, y = 1$ )

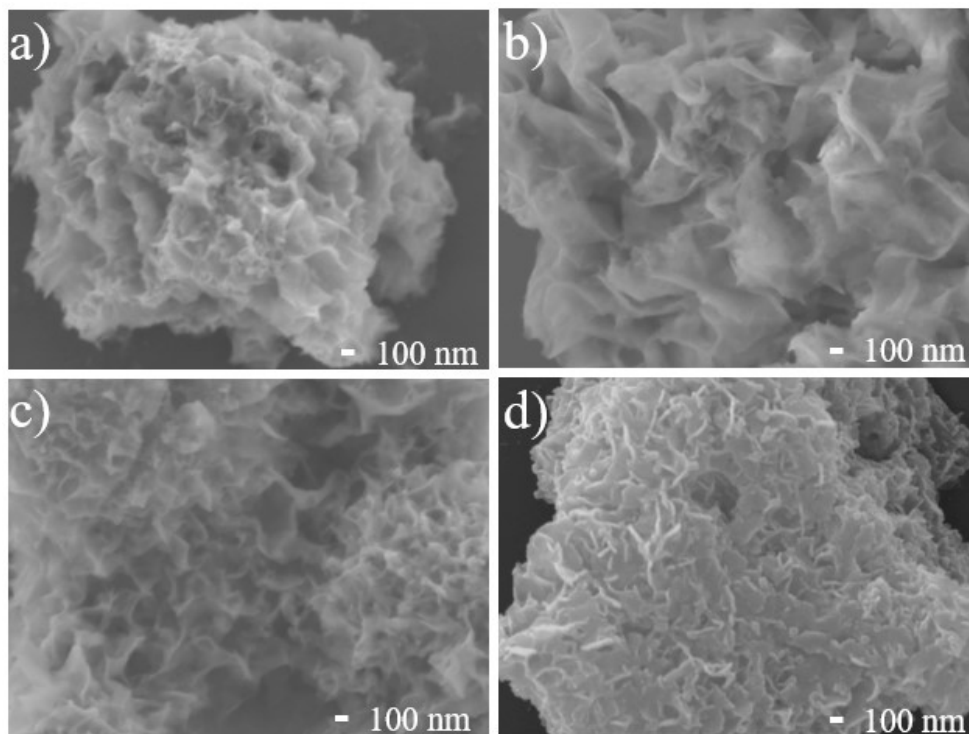

**Fig. S2** The SEM images of (a) Ni-S-140-6, (b)  $\text{Ni}_1\text{Co}_1\text{-S-140-6}$ , (c)  $\text{Ni}_1\text{Co}_2\text{-S-140-6}$ , and (d) Co-S-140-6.

All the sulfides derived from monometallic and bimetallic  $\text{Ni}_x\text{Co}_y\text{-MOFs}$  after sulfidation at 140 °C for 6 h exhibit the tremella-like morphology, assembled by abundant nanosheets. The looseness degree and sizes of interlaced nanosheets firstly increase when the content of Co ions from 0 to 50%, and then decrease along with increasing the content of Co ions up to 100%. The incorporation of Co ions in the Ni-MOFs leads to slightly modification on the morphology of their respective sulfides, further illustrating the good compatibility of cobalt and nickel ions in the framework of MOFs.



### 1.5.2 SEM images of $\text{Ni}_x\text{Co}_y\text{-MOF}$ , $\text{Ni}_2\text{Co}_1\text{-C}$ , $\text{Ni}_2\text{Co}_1\text{-O}$ , $\text{Ni}_2\text{Co}_1\text{-OH}$ , and $\text{Ni}_2\text{Co}_1\text{-S-140-6}$

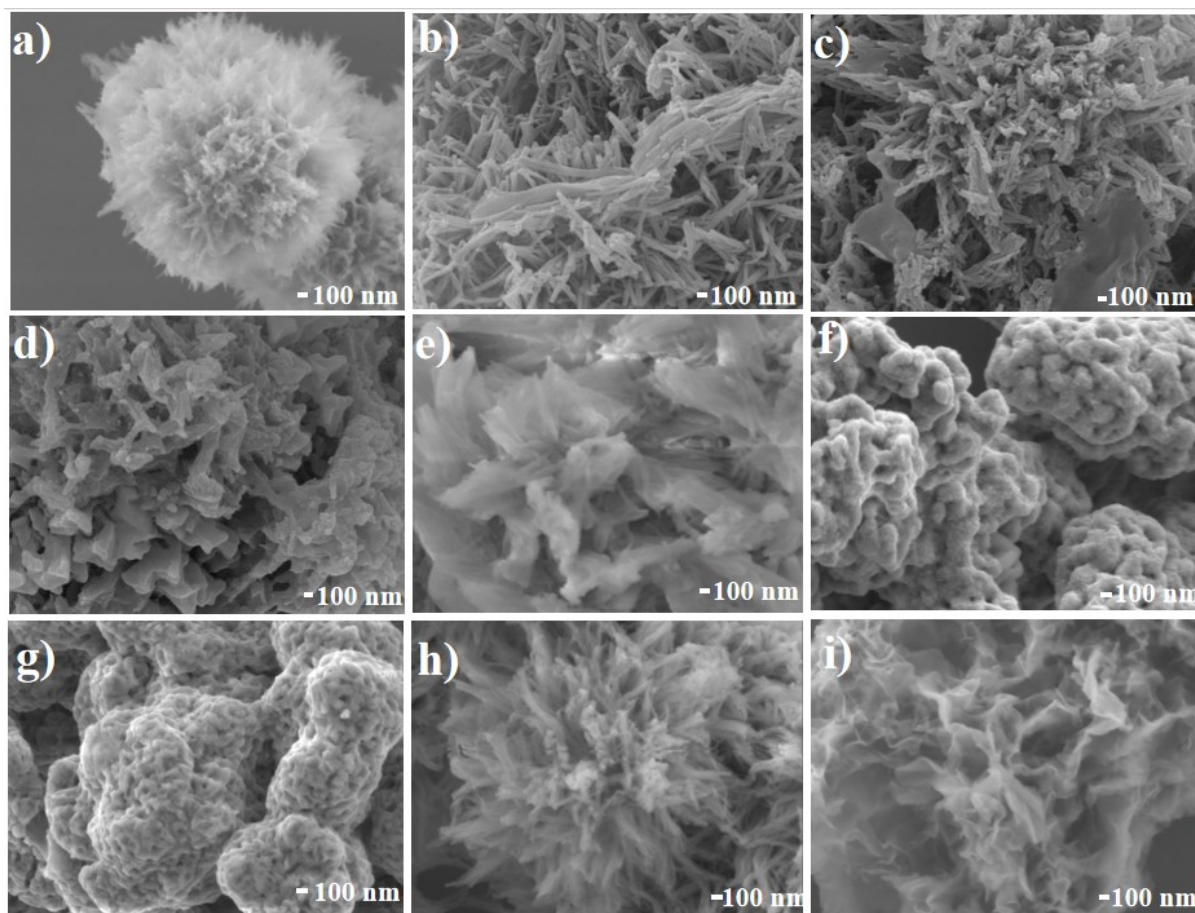

**Fig. S3** The SEM images of (a) Ni-MOF, (b)  $\text{Ni}_2\text{Co}_1\text{-MOF}$ , (c)  $\text{Ni}_1\text{Co}_1\text{-MOF}$ , (d)  $\text{Ni}_1\text{Co}_2\text{-MOF}$ , (e) Co-MOF, (f)  $\text{Ni}_2\text{Co}_1\text{-C}$ , (g)  $\text{Ni}_2\text{Co}_1\text{-O}$ , (h)  $\text{Ni}_2\text{Co}_1\text{-OH}$ , and (i)  $\text{Ni}_2\text{Co}_1\text{-S-140-6}$ .

The detailed discussions about the comparison of morphologies of  $\text{Ni}_x\text{Co}_y\text{-MOF}$ ,  $\text{Ni}_2\text{Co}_1\text{-C}$ ,  $\text{Ni}_2\text{Co}_1\text{-O}$ ,  $\text{Ni}_2\text{Co}_1\text{-OH}$ , and  $\text{Ni}_2\text{Co}_1\text{-S-140-6}$  have been described in the section of Scanning electron microscopy of main text.

### 1.5.3 SEM images of $\text{Ni}_2\text{Co}_1\text{-S-140-}t$ ( $T=1, 6, 12\text{h}$ )

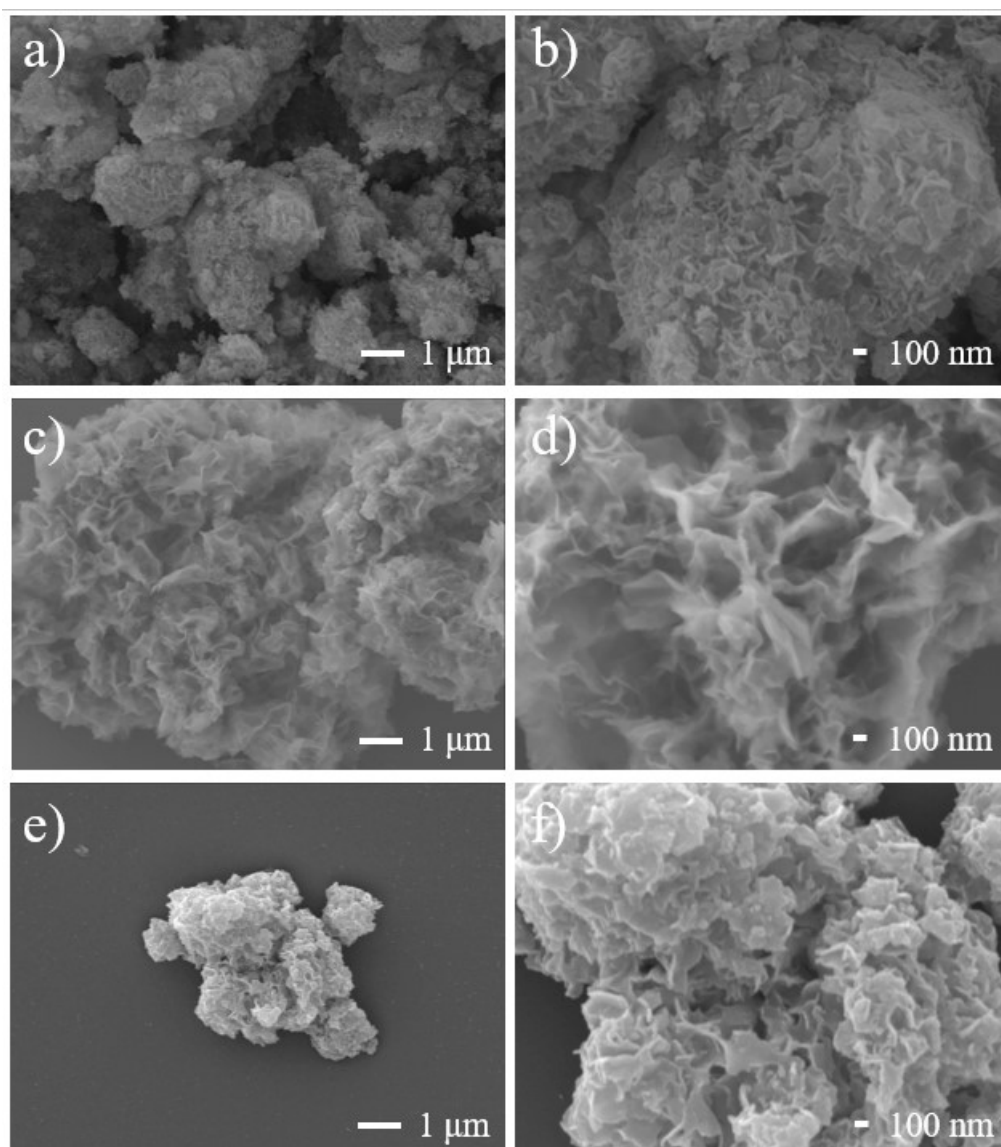

**Fig. S4** The SEM images of  $\text{Ni}_2\text{Co}_1\text{-S-140-}t$ : (a-b)  $t = 1$  h, (c-d)  $t = 6$  h, (e-f)  $t = 12$  h.

The  $\text{Ni}_2\text{Co}_1\text{-S-140-6}$  sample, obtained after sulfidation at  $140\text{ }^\circ\text{C}$  for 6 h, exhibits the porous tremella-like structure, composed by large interlaced and fluffer nanosheets, while  $\text{Ni}_2\text{Co}_1\text{-S-140-1}$  and  $\text{Ni}_2\text{Co}_1\text{-S-140-12}$ , generated after sulfidation at  $140\text{ }^\circ\text{C}$  for 1 and 12 h, respectively, show irregular spheres morphologies assembled by tightly packed nanosheets (Fig. S4). These results clarify that the morphologies of  $\text{Ni}_2\text{Co}_1\text{-MOF}$  derived sulfides are changed upon varying the sulfidation time, which probably influences the electrochemical performances of sulfides.

#### 1.5.4 SEM images of Ni<sub>2</sub>Co<sub>1</sub>-S-T-6 (T = 100, 140, 180 °C)

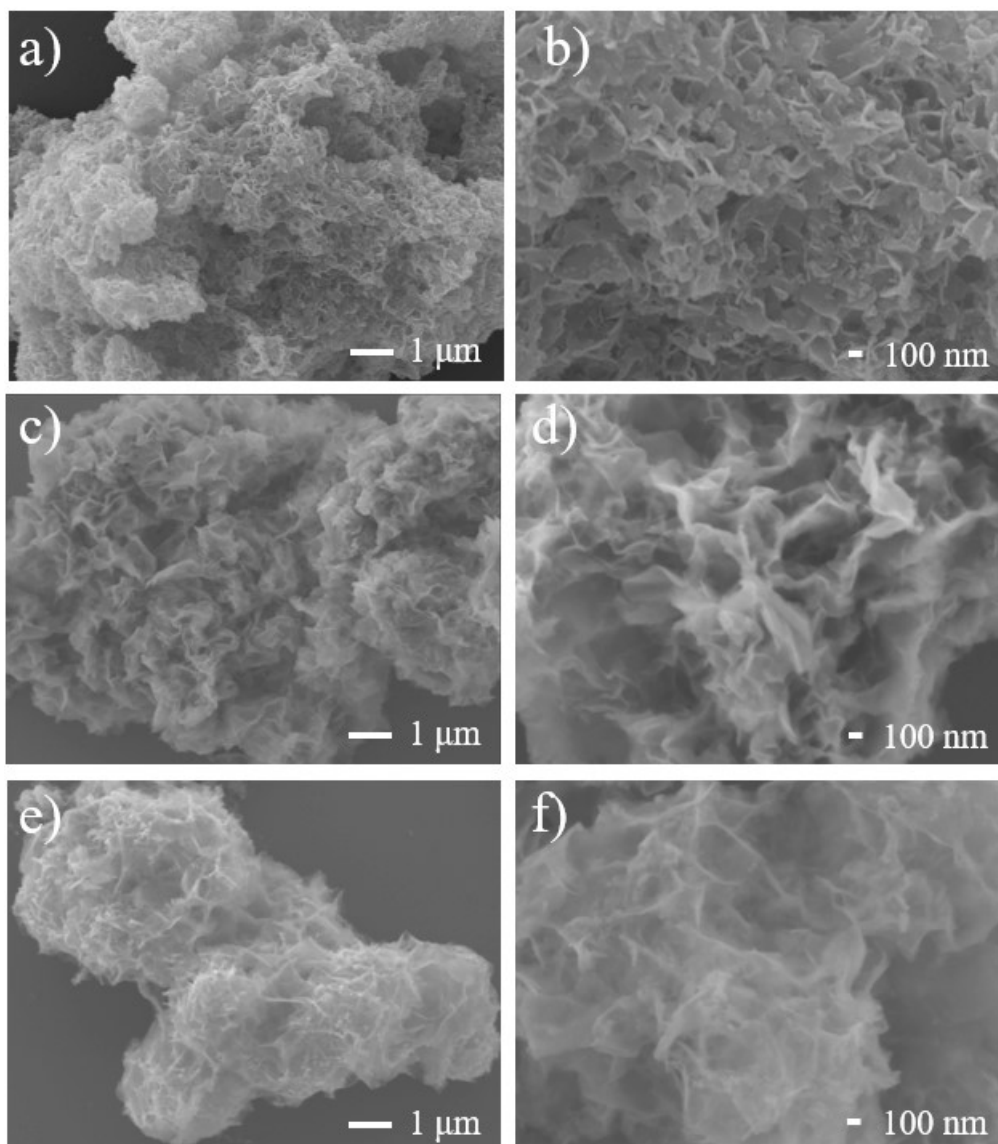

**Fig. S5** The SEM images of Ni<sub>2</sub>Co<sub>1</sub>-S-T-6: (a-b)  $T = 100$  °C, (c-d)  $T = 140$  °C, (e-f)  $T = 180$  °C.

Supplementary Fig. S5 shows the morphological evolution of Ni<sub>2</sub>Co<sub>1</sub>-S-T-6 materials upon sulfidation temperature ( $T = 100$  °C, 140 °C and 180 °C). When the sulfidation temperature is 100 °C, Ni<sub>2</sub>Co<sub>1</sub>-S-100-6 shows a metal foam-like morphology, composed of 2D nanosheets, while further increase the temperature up to 140 and 180 °C, respectively, the morphologies of Ni<sub>2</sub>Co<sub>1</sub>-S-140-6 and Ni<sub>2</sub>Co<sub>1</sub>-S-180-6 are changed to the fresh-lettuce-like structures assembled by larger nanosheets. These results demonstrate that sulfidation temperature is also changed the morphology of Ni<sub>2</sub>Co<sub>1</sub>-MOF derived sulfides, which probably influences the electrochemical performances of sulfides.

## 1.6 TEM analysis

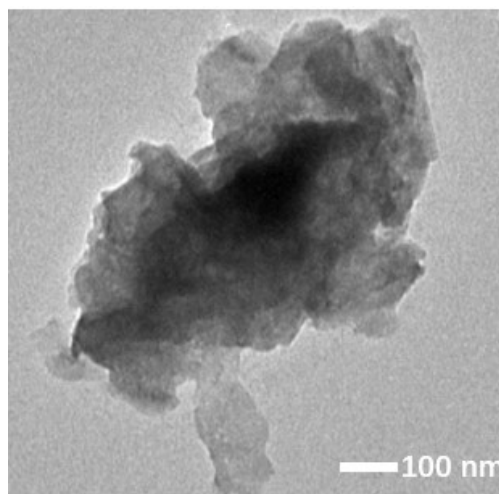

Fig. S6 The TEM image of Ni<sub>2</sub>Co<sub>1</sub>-S-140-6.

## 2.0 Electrochemical performance

### 2.1 GITT data of Ni<sub>2</sub>Co<sub>1</sub>-MOF, Ni<sub>2</sub>Co<sub>1</sub>-S, Ni<sub>2</sub>Co<sub>1</sub>-C, Ni<sub>2</sub>Co<sub>1</sub>-O, and Ni<sub>2</sub>Co<sub>1</sub>-OH

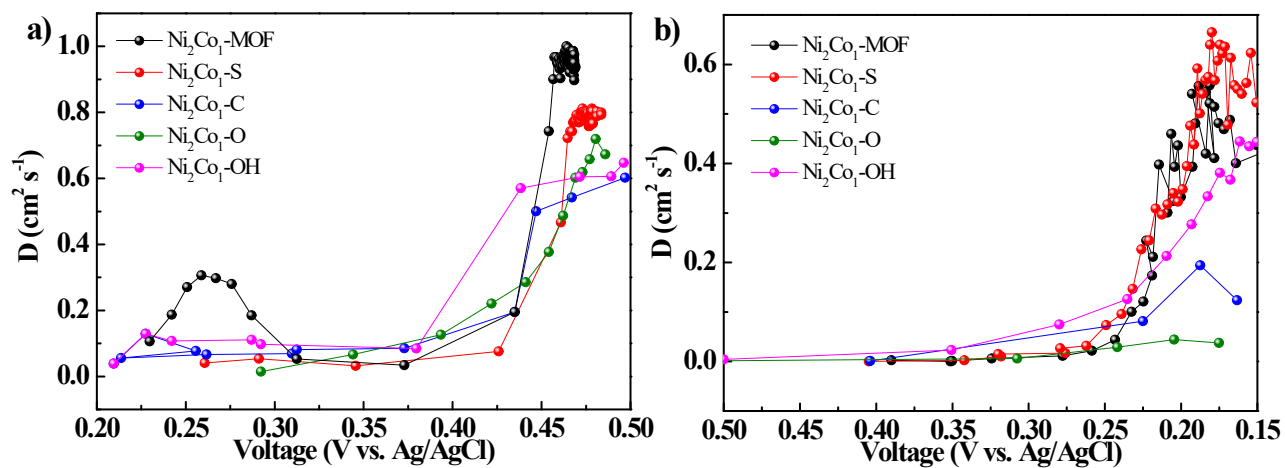

Fig. S7 The GITT curves of Ni<sub>2</sub>Co<sub>1</sub>-MOF, Ni<sub>2</sub>Co<sub>1</sub>-S, Ni<sub>2</sub>Co<sub>1</sub>-C, Ni<sub>2</sub>Co<sub>1</sub>-O, and Ni<sub>2</sub>Co<sub>1</sub>-OH at (a) charge process and (b) discharge process

## 2.2 Electrochemical performance of Ni<sub>2</sub>Co<sub>1</sub>-S-*T-t*

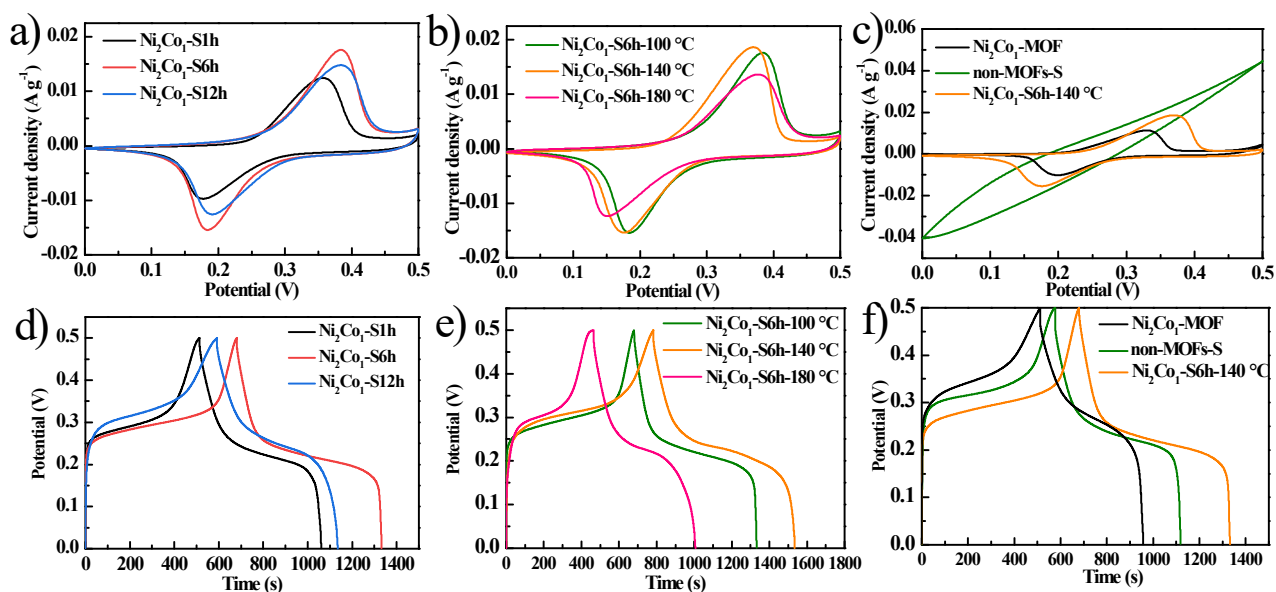

**Fig. S8** The CV curves at 50 mV s<sup>-1</sup> of (a) Ni<sub>2</sub>Co<sub>1</sub>-S-140-*t*, (b) Ni<sub>2</sub>Co<sub>1</sub>-S-*T*-6, (c) Ni<sub>2</sub>Co<sub>1</sub>-MOF, Ni<sub>2</sub>Co<sub>1</sub>-S-140-6 and the sulfide non-MOF-S, obtained sulfidation of the physical mixture of Ni(NO<sub>3</sub>)<sub>2</sub> and Co(NO<sub>3</sub>)<sub>2</sub>. The GCD curves at 1 A g<sup>-1</sup> of (d) Ni<sub>2</sub>Co<sub>1</sub>-S-140-*t*, (e) Ni<sub>2</sub>Co<sub>1</sub>-S-*T*-6, (f) Ni<sub>2</sub>Co<sub>1</sub>-MOF, Ni<sub>2</sub>Co<sub>1</sub>-S-140-6 and the sulfide non-MOF-S.

The detailed discussions about the comparison of Electrochemical performance of Ni<sub>2</sub>Co<sub>1</sub>-S-*T-t* have been described in the section of optimizing sulfidation parameters for boosting electrochemical performances of Ni<sub>2</sub>Co<sub>1</sub>-S-*T-t* materials of main text.

### 2.3 Electrochemical performance of PPy@AECC

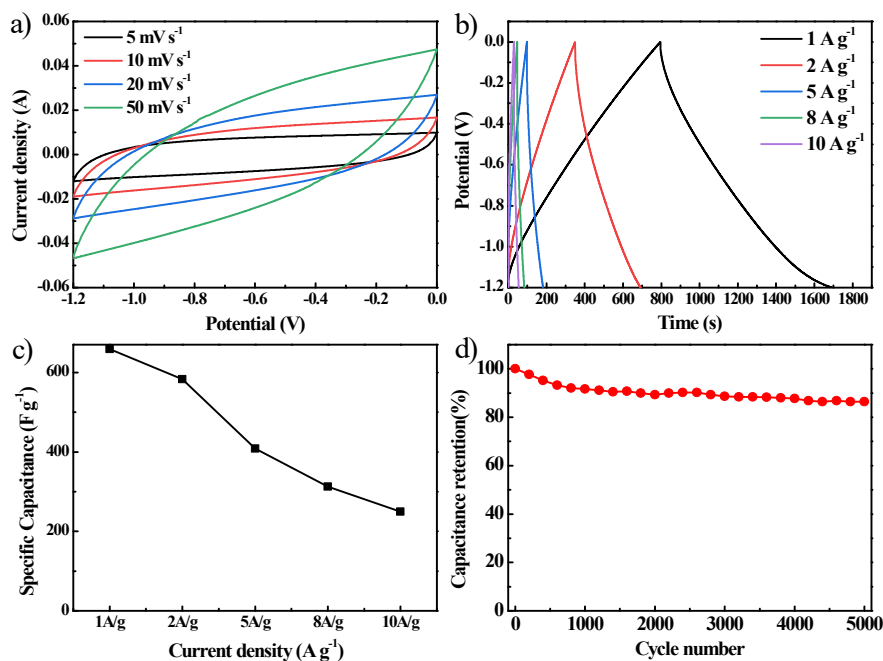

**Fig. S9** Electrochemical performance of PPy@AECC tested in 1.0 M KOH: (a) CV curves at different scan rates ranging from 5 to 50 mV s<sup>-1</sup>, (b) GCD curves at different discharge current densities ranging from 1 to 10 A g<sup>-1</sup>, (c) the specific capacitances at various discharge current densities ranging from 1 to 10 A g<sup>-1</sup>, (d) the plots of specific capacitances at 10 A g<sup>-1</sup> over 5000 charge/discharge cycles.

For PPy@AECC negative electrode material, the potential windows for is -1.2 to 0 V in a three-electrode system (Fig. S9a), and the specific capacitance, calculated based on the imperfect symmetry GCD curves at 1 A g<sup>-1</sup> is 659F g<sup>-1</sup> (Fig. S9b), the rate capability when the discharge current densities ranging from 1 to 10 A g<sup>-1</sup> is 37.9% (Fig. S9c), and the capacitance retention at 10 A g<sup>-1</sup> is 86.4% after charge/discharge of 5000 cycles (Fig. S9d).

## 2.4 The Nyquist plots of Ni<sub>2</sub>Co<sub>1</sub>-S-140-6//PPy@AECC device

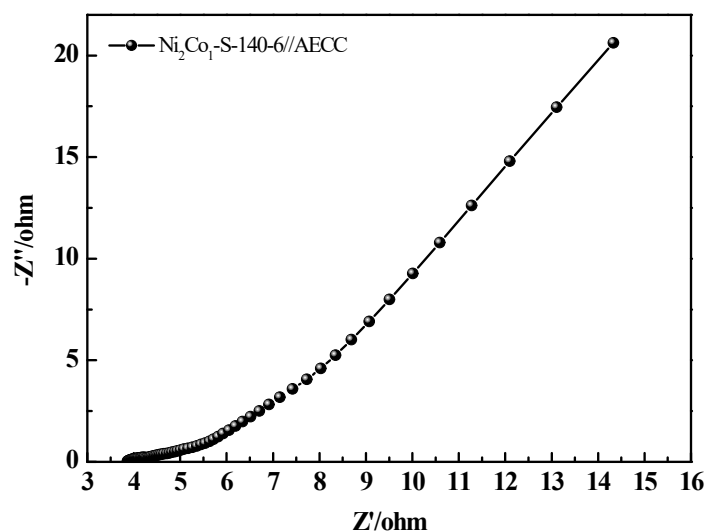

**Fig. S10** The Nyquist plots of the fabricated Ni<sub>2</sub>Co<sub>1</sub>-S-140-6//PPy@AECC A-ASC device tested in 1 M KOH.

The Rs of Ni<sub>2</sub>Co<sub>1</sub>-S-140-6//PPy@AECC A-ASC device is 2.38 Ω, calculated based on the Nyquist plot (Fig. S10).

## 2.5 The Rct and Rs of Ni<sub>x</sub>Co<sub>y</sub>-MOF and Ni<sub>2</sub>Co<sub>1</sub>-MOF derivatives.

**Table S4** The Rct and Rs of Ni<sub>x</sub>Co<sub>y</sub>-MOF and Ni<sub>2</sub>Co<sub>1</sub>-MOF derivatives.

|                                          | Rs (Ω) | Rct (Ω) |                                           | Rs (Ω) | Rct (Ω) |
|------------------------------------------|--------|---------|-------------------------------------------|--------|---------|
| Ni-MOF                                   | 4.495  | 3.163   | Ni-S-140-6                                | 2.483  | 3.852   |
| Ni <sub>1</sub> Co <sub>2</sub> -MOF     | 2.363  | 0.2416  | Ni <sub>1</sub> Co <sub>2</sub> -S-140-6  | 3.801  | 1.828   |
| Ni <sub>1</sub> Co <sub>1</sub> -MOF     | 2.866  | 0.5231  | Ni <sub>1</sub> Co <sub>1</sub> -S-140-6  | 4.171  | 2.447   |
| Ni <sub>2</sub> Co <sub>1</sub> -MOF     | 2.706  | 0.627   | Co-S-140-6                                | 2.427  | 0.1668  |
| Co-MOF                                   | 5.448  | 0.7277  | Ni <sub>2</sub> Co <sub>1</sub> -S-100-1  | 4.255  | 0.5463  |
| Ni <sub>2</sub> Co <sub>1</sub> -S-140-6 | 3.162  | 0.8825  | Ni <sub>2</sub> Co <sub>1</sub> -S-100-6  | 3.162  | 0.8825  |
| Ni <sub>2</sub> Co <sub>1</sub> -C       | 4.687  | 0.496   | Ni <sub>2</sub> Co <sub>1</sub> -S-100-12 | 3.229  | 0.8759  |
| Ni <sub>2</sub> Co <sub>1</sub> -O       | 3.766  | 0.6918  | Ni <sub>2</sub> Co <sub>1</sub> -S-100-6  | 4.255  | 0.9439  |
| Ni <sub>2</sub> Co <sub>1</sub> -OH      | 3.868  | 0.1176  | Ni <sub>2</sub> Co <sub>1</sub> -S-140-6  | 3.162  | 0.8825  |
| Non-MOFs-S                               | 4.251  | 1.328   | Ni <sub>2</sub> Co <sub>1</sub> -S-180-6  | 4.49   | 1.058   |

As shown in Tab. S4, the Rct of bimetallic Ni<sub>x</sub>Co<sub>y</sub>-MOF (Ni<sub>1</sub>Co<sub>2</sub>-MOF: 0.2416 Ω; Ni<sub>1</sub>Co<sub>1</sub>-MOF: 0.5231 Ω and Ni<sub>2</sub>Co<sub>1</sub>-MOF: 0.627 Ω) were significantly lower than that of Ni-MOF (3.1630 Ω) and Co-MOF (0.7277 Ω), indicating that bimetallic Ni<sub>x</sub>Co<sub>y</sub>-MOF exhibit better good charge transfer capability compared with that of Ni-MOF and Co-MOF. The Rct values of Ni<sub>2</sub>Co<sub>1</sub>-S-140-6 (0.8825 Ω) and Ni<sub>2</sub>Co<sub>1</sub>-O (0.6918) are comparable to that of Ni<sub>2</sub>Co<sub>1</sub>-MOF, illuminating that the charge transfer capabilities of Ni<sub>2</sub>Co<sub>1</sub>-MOF almost maintain after sulfidation and oxidation. Ni<sub>2</sub>Co<sub>1</sub>-C (0.4960 Ω) and Ni<sub>2</sub>Co<sub>1</sub>-OH (0.1176 Ω) exhibit the lower Rct, compared to Ni<sub>2</sub>Co<sub>1</sub>-MOF, the charge transfer capabilities of Ni<sub>2</sub>Co<sub>1</sub>-MOF are slightly enhanced after carbonization and hydroxylation.

## 2.6 the electrochemical performance of the Ni<sub>2</sub>Co<sub>1</sub>-C-900

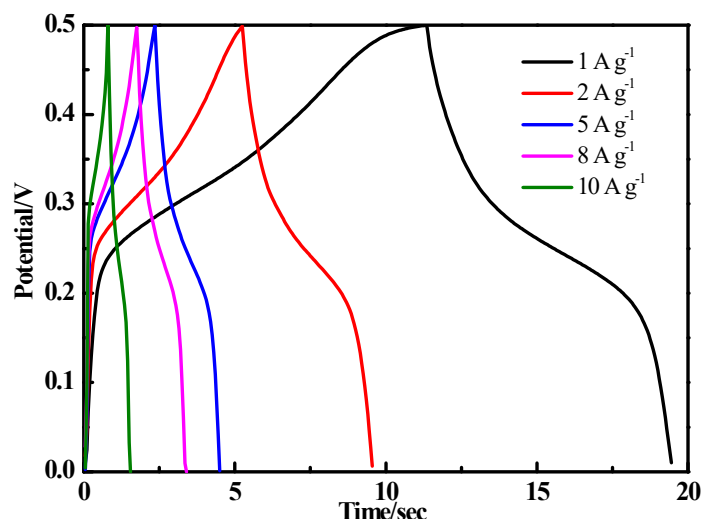

**Fig. S11** GCD curves at different discharge current densities ranging from 1 to 10 A g<sup>-1</sup> of Ni<sub>2</sub>Co<sub>1</sub>-C-900.

After elevating the carbonization temperature of Ni<sub>2</sub>Co<sub>1</sub>-MOF to 900 °C, the GCD curves reveal that the specific capacitance of Ni<sub>2</sub>Co<sub>1</sub>-C-900 is comparable to that carbonized at Ni<sub>2</sub>Co<sub>1</sub>-C-600, indicating elevating carbonization temperature does not lead to high chemical performance of Ni<sub>2</sub>Co<sub>1</sub>-MOF carbonization derivative.



### 3.0 Supplementary References

1. Z. Fang, B. Bucken, D. E. De Vos and R. A. Fischer, Defect-Engineered Metal-Organic Frameworks, *Angew. Chem. Int. Ed.*, 2015, **54**, 7234-7254.
2. W. Xu, Y. Zhang, J. Wang, Y. Xu, L. Bian, Q. Ju, Y. Wang and Z. Fang, Defects engineering simultaneously enhances activity and recyclability of MOFs in selective hydrogenation of biomass, *Nat. Commun.*, 2022, **13**, 2068.
3. W. Xu, K. B. Thapa, Q. Ju, Z. Fang and W. Huang, Heterogeneous catalysts based on mesoporous metal–organic frameworks, *Coordination Chemistry Reviews*, 2018, **373**, 199-232.
4. Z. Fang, J. P. Durholt, M. Kauer, W. Zhang, C. Lochenie, B. Jee, B. Albada, N. Metzler-Nolte, A. Poppl, B. Weber, M. Muhler, Y. Wang, R. Schmid and R. A. Fischer, Structural complexity in metal-organic frameworks: simultaneous modification of open metal sites and hierarchical porosity by systematic doping with defective linkers, *J Am Chem Soc*, 2014, **136**, 9627-9636.
